# Supplementary material
Source: PubMed Central journal article supplement (PMC3879633)
Supplement: supp_M113.031435_mcp.M113.031435-1.pdf [file supp_M113.031435_mcp.M113.031435-1.pdf]

## Supplementary material

### Quality measures of imaging mass spectrometry aids in revealing long-term striatal protein changes induced by neonatal exposure to the cyanobacterial toxin $\beta$ -N-methylamino-L-alanine (BMAA)

Oskar Karlsson<sup>\*</sup>, Jonas Bergquist<sup>\*\*</sup>, Malin Andersson<sup>\*</sup>

<sup>\*</sup>Department of Pharmaceutical Biosciences, Uppsala University, 751 24 Uppsala, Sweden.

<sup>\*\*</sup>Department of Chemistry BMC, Analytical Chemistry, Uppsala University, 751241 Uppsala, Sweden

| m/z                             | Control   | 150 mg/kg |             | 460 mg/kg |              |
|---------------------------------|-----------|-----------|-------------|-----------|--------------|
|                                 | Intensity | Intensity | p-value     | Intensity | p-value      |
| <b><i>Nucleus accumbens</i></b> |           |           |             |           |              |
| 5433                            | 698±76    | 605±34    | 0.48        | 514±23    | <b>0.027</b> |
| 8723                            | 847±80    | 693±46    | 0.14        | 610±35    | <b>0.012</b> |
| 15808 <sup>1</sup>              | 349±22    | 298±20    | 0.10        | 267±10    | <b>0.003</b> |
| 15890 <sup>1</sup>              | 288±6     | 251±22    | <b>0.02</b> | 277±16    | 0.056        |
| <b><i>Caudate putamen</i></b>   |           |           |             |           |              |
| 8723                            | 729±36    | 657±26    | 0.22        | 591±12    | <b>0.008</b> |
| 13935                           | 317±13    | 273±10    | <b>0.03</b> | 287±5     | 0.054        |
| 13952                           | 399±19    | 335±16    | <b>0.02</b> | 350±13    | 0.054        |

**Table 1.** Affected ion peaks from nucleus accumbens and caudate putamen that could not be conclusively identified. Intergroup comparisons were tested using non-parametric Kruskal-Wallis ANOVA followed by post hoc analysis using the Mann-Whitney U-test. All ion peaks were significant ( $p < 0.05$ ) in the Kruskal-Wallis ANOVA. The table show peak intensity  $\pm$ SEM and post hoc p-values when compared to vehicle control animals. Vehicle control: n = 6 animals; BMAA (150 mg/kg): n = 8 animals; BMAA (460 mg/kg): n = 7 animals

<sup>1</sup>Putative hemoglobin peaks.

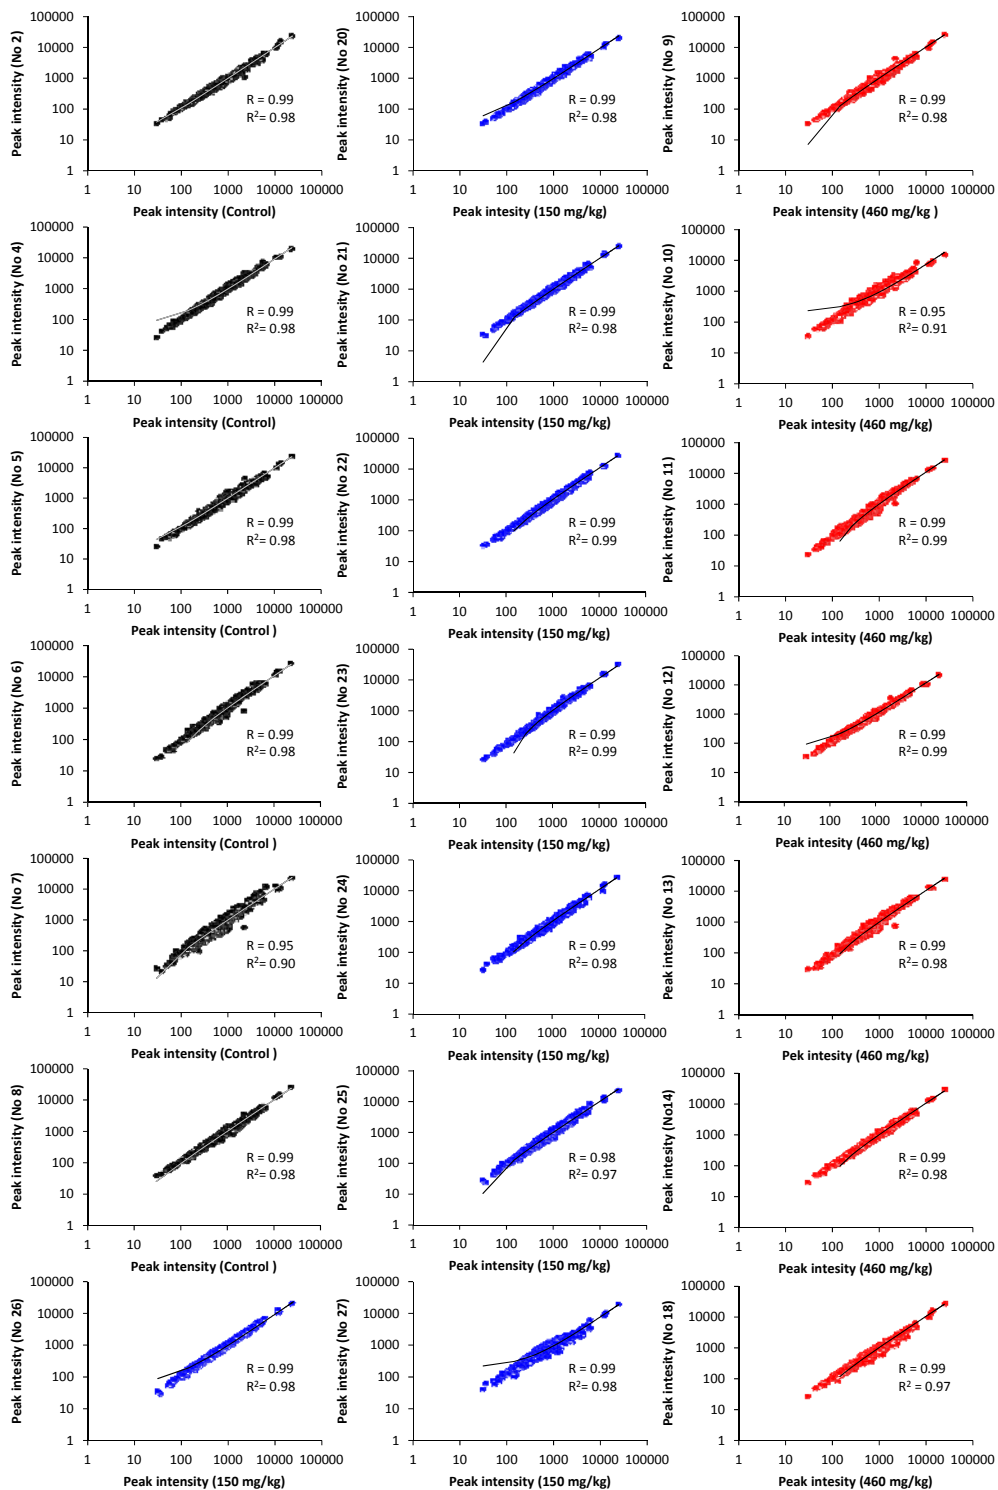

**Figure 1.** Intensity-intensity plots of peak intensities in the striatum of each animal vs their respective group average. Each dot represents one peak. Pearson's R coefficient was calculated for each animal and ranged from 0.95 to 0.99 (mean = 0.986). Vehicle control (black); 150 mg/kg BMAA (blue); 460 mg/kg BMAA (red).
